# Supplementary material
Source: MDPI journal article supplement (https://www.mdpi.com/2073-4433/12/2/267)
Supplement: s1 [file s1]

## Supplementary Materials:

# Toward Understanding the Variation of Air Quality based on a Comprehensive Analysis in Hebei Province under the Influence of COVID-19 Lockdown

Shuyi Jiang, Chuanfeng Zhao \* and Hao Fan

College of Global Change and Earth System Science, and State Key Laboratory of Earth Surface Processes and Resource Ecology, Beijing Normal University, Beijing 100875, China;

\* Correspondence: Chuanfeng Zhao, czhao@bnu.edu.cn; Tel.: +86-010-5880-2171

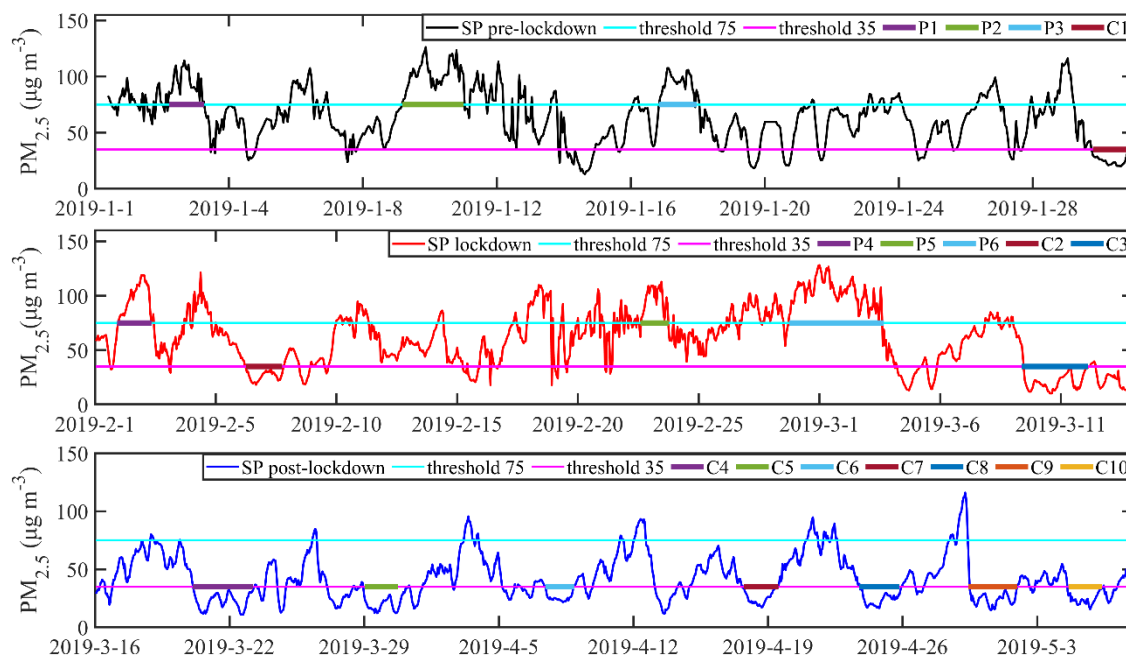

**Figure S1.** The time series of PM<sub>2.5</sub> during the same three study periods of pre-lockdown, lockdown, and post-lockdown in 2019 (SP19), along with the classification of pollution, moderate, and clean days. “threshold 75” represents the value is equal to 75. “threshold 35” represents the value is equal to 35. “P” represents pollution events and “C” represents clean events.
